# Supplementary material
Source: ML conference proceedings conference paper supplement (https://proceedings.neurips.cc/paper_files/paper/2008/hash/92c8c96e4c37100777c7190b76d28233-Abstract.html)
Supplement: Supplementary file 1 [file 92c8c96e4c37100777c7190b76d28233-Supplemental.zip]

Archive with 1 entries (1 files):
- appendix_sparseonline.pdf
